# Supplementary material for: The Survival Outcomes, Prognostic Factors and Adverse Events following Systemic Chemotherapy Treatment in Bone Sarcomas: A Retrospective Observational Study from the Experience of the Cancer Referral Center in Northern Thailand
Source: MDPI journal article supplement (doi:10.3390/cancers15071979), 2023-03-26
Supplement: s1 [file s1]

**Supplementary Table S1.** The estimated 5-year DFS and 5-year OS of osteosarcoma patients by the Flexible parametric survival model.

| Prognostic factors                           | 5-year disease free survival |                  | 5-year overall survival |                  |
|----------------------------------------------|------------------------------|------------------|-------------------------|------------------|
|                                              | aHR (95% CI)                 | <i>p</i> value   | aHR (95% CI)            | <i>p</i> value   |
| <b>Gender</b>                                |                              |                  |                         |                  |
| Female                                       | 0.33 (0.16-0.72)             | <b>0.005</b>     | 0.41 (0.20-0.87)        | <b>0.019</b>     |
| Male                                         | (ref.)                       |                  | (ref.)                  |                  |
| <b>Age group (years)</b>                     |                              |                  |                         |                  |
| ≥ 18 years                                   | 0.60 (0.26-1.37)             | 0.224            | 0.64 (0.51-2.14)        | 0.269            |
| < 18 years                                   | (ref.)                       |                  | (ref.)                  |                  |
| <b>Resectable</b>                            | 0.17 (0.07-0.40)             | <b>&lt;0.001</b> | 0.21 (0.09-0.50)        | <b>&lt;0.001</b> |
| <b>Unresectable/metastasis</b>               | (ref.)                       |                  | (ref.)                  |                  |
| <b>Received neoadjuvant chemotherapy</b>     |                              |                  |                         |                  |
| TNR ≥ 90%                                    | 0.08 (0.01-0.62)             | <b>0.016</b>     | 0.09 (0.01-0.74)        | <b>0.024</b>     |
| TNR 50-89%                                   | 2.37 (0.84-6.73)             | 0.105            | 1.59 (0.58-4.34)        | 0.365            |
| TNR < 50%                                    | 0.58 (0.23-1.48)             | 0.257            | 0.71 (0.29 -1.69)       | 0.436            |
| <b>Not received neoadjuvant chemotherapy</b> | (ref.)                       |                  | (ref.)                  |                  |
| <b>Radiation therapy</b>                     | 1.47 (0.71-3.01)             | 0.319            | 1.38 (0.66-2.85)        | 0.338            |

**Abbreviations:** aHR, Adjusted hazard ratio; TNR, Tumor necrosis rate (post neoadjuvant chemotherapy).

**Supplementary Table S2.** The estimated 5-year DFS and 5-year OS of Ewing's sarcoma patients by the Flexible parametric survival model.

| Prognostic factors             | 5-year disease free survival | 5-year overall survival |                   |                   |
|--------------------------------|------------------------------|-------------------------|-------------------|-------------------|
|                                | aHR (95% CI)                 | <i>p</i><br>value       | aHR (95% CI)      | <i>p</i><br>value |
| <b>Gender</b>                  |                              |                         |                   |                   |
| Female                         | 0.46 (0.14-1.49)             | 0.194                   | 0.69 (0.19-2.46)  | 0.566             |
| Male                           | (ref.)                       |                         | (ref.)            |                   |
| <b>Age group (years)</b>       |                              |                         |                   |                   |
| ≥ 25 years                     | 6.05 (1.46-25.10)            | <b>0.013</b>            | 6.79 (1.33-34.72) | <b>0.021</b>      |
| < 25 years                     | (ref.)                       |                         | (ref.)            |                   |
| <b>Resectable</b>              | 0.16 (0.04-0.67)             | <b>0.012</b>            | 0.06 (0.01-0.51)  | <b>0.010</b>      |
| <b>Unresectable/metastasis</b> | (ref.)                       |                         | (ref.)            |                   |
| <b>Radiation therapy</b>       | 0.49 (0.14-1.66)             | 0.253                   | 0.36 (0.08-1.62)  | 0.183             |

Abbreviations: aHR, Adjusted hazard ratio; CMT, chemotherapy.
